# Supplementary material for: High dose vitamin D exacerbates central nervous system autoimmunity by raising T-cell excitatory calcium
Source: Oxford University Press journal article supplement (doi:10.1093/brain/awz190), 2019-06-19
Supplement: awz190_supplementary_data.pdf [file awz190_supplementary_data.pdf]

## Supplementary Material

### Suppl. table 1. Primer used for real-time quantitative PCR

#### Primer mouse:

| Target        | Assay ID<br>(Bio-Rad) | Amplicon length | Assay Design    |
|---------------|-----------------------|-----------------|-----------------|
| IL-2          | qMmuCID0015786        | 80              | Intron-spanning |
| IFNgamma      | qMmuCID0006268        | 175             | Intron-spanning |
| GM-CSF (CSF2) | qMmuCED0025728        | 133             | Exonic          |
| Actin-beta    | qMmuCED0027505        | 109             | Exonic          |

#### Primer human:

| Target        | Assay ID<br>(Thermo Fisher<br>Scientific) | Amplicon<br>length | Fw primer                                 | Rv primer                                    |
|---------------|-------------------------------------------|--------------------|-------------------------------------------|----------------------------------------------|
| IL-2          | Hs00698651_CE                             | 230                | AAGGCCTGA<br>TATGTTTTAA<br>GTGGGAA        | GCCTATAAGA<br>CTTCAATTGG<br>GAATAACTGT<br>AT |
| IFNgamma      | Hs00607988_CE                             | 262                | AAAACAAAG<br>GATTAAGTG<br>AGACAGTCA<br>CA | GGAAGCGAAA<br>AAGGAGTCAG<br>ATG              |
| GM-CSF (CSF2) | Hs00664932_CE                             | 254                | CCTCCCTGG<br>CATTTTGTG<br>GT              | AGTGTCTCTA<br>CTCAGGTTCA<br>GGAG             |
| Actin-beta    | Hs00800199_CE                             | 254                | ACAGGACTC<br>CATGCCTGA<br>GA              | GCCCTGGACT<br>TCGAGCAA                       |

| Mineral content<br>in experimental diets |      |      |      |
|------------------------------------------|------|------|------|
|                                          | Low  | Std  | Hi   |
|                                          | %    |      |      |
| Calcium                                  | 0.9  | 1.0  | 0.9  |
| Phosphorus                               | 0.63 | 0.70 | 0.63 |
| Sodium                                   | 0.19 | 0.24 | 0.21 |

**Suppl. figure 1. Low-, standard- and high vitamin D diets have similar calcium, phosphorus and sodium contents.** Low, standard or high vitamin D diets contained standard concentrations of calcium, phosphorus and sodium.

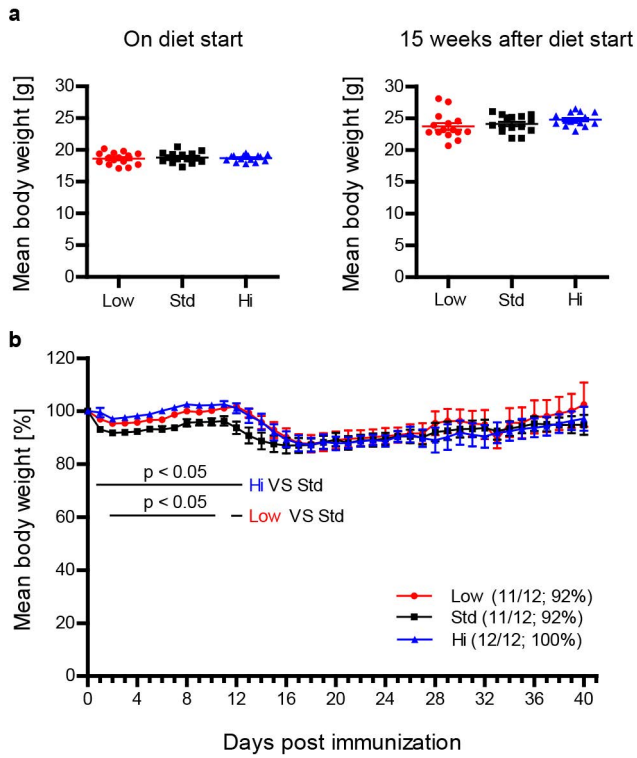

**Suppl. figure 2. Vitamin D high excess supplementation has no impact on body weight. (a)** Body weight was determined before and fifteen weeks after mice were fed a diet containing low (< 5 IU/kg food), standard (1.500 IU/kg food) or high vitamin D concentrations (75.000 IU/kg food); (data given as mean  $\pm$  SEM; n = 15). **(b)** EAE was induced by MOG peptide 35-55 immunization fifteen weeks after diet onset. Body weights are shown as mean  $\pm$  SEM; disease incidence is indicated in brackets; n = 12.

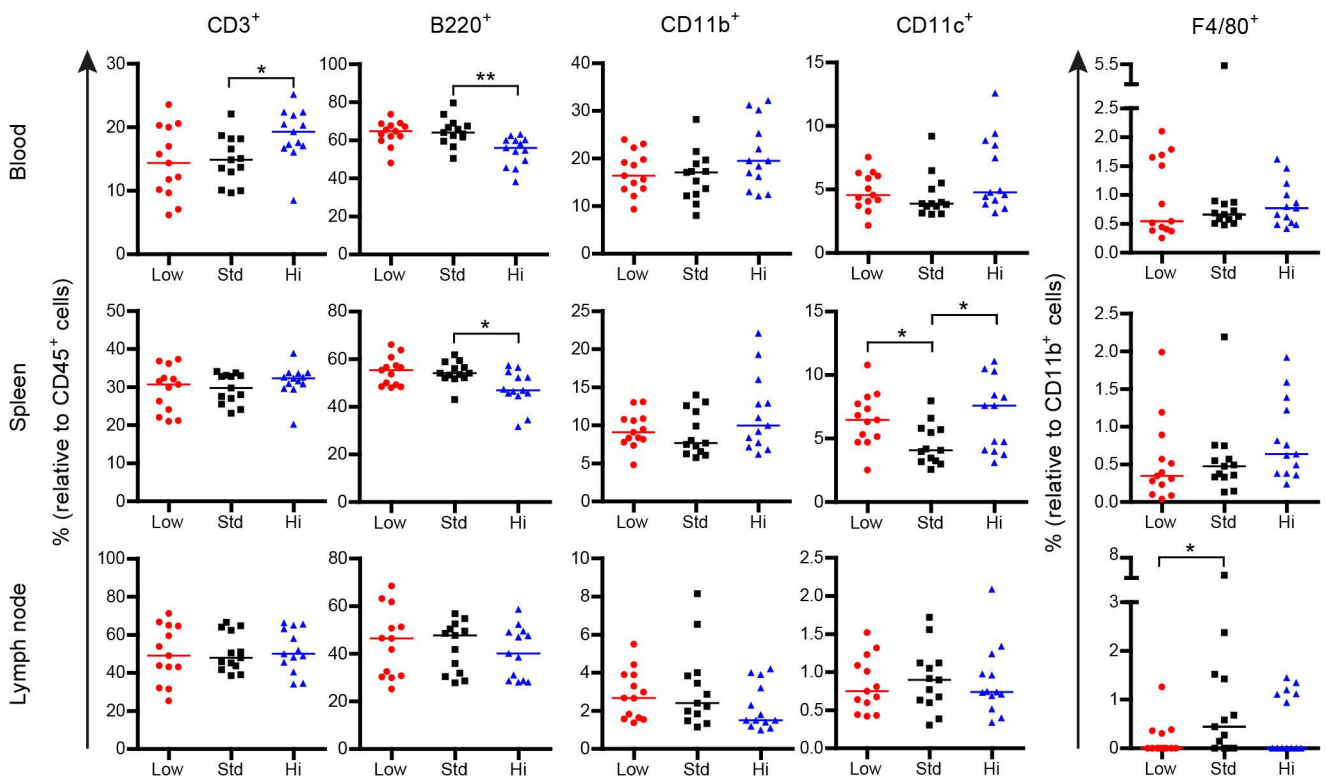

**Suppl. figure 3. Vitamin D high excess supplementation increases the frequencies of T cells, CD11c<sup>+</sup> myeloid APCs as well as F4/80<sup>+</sup> macrophages.** Frequencies of immune cells in blood, spleen and inguinal lymph node were analyzed by FACS forty-nine weeks after vitamin D diet onset (data given as median; representative plots of two independent experiments; n = 13).

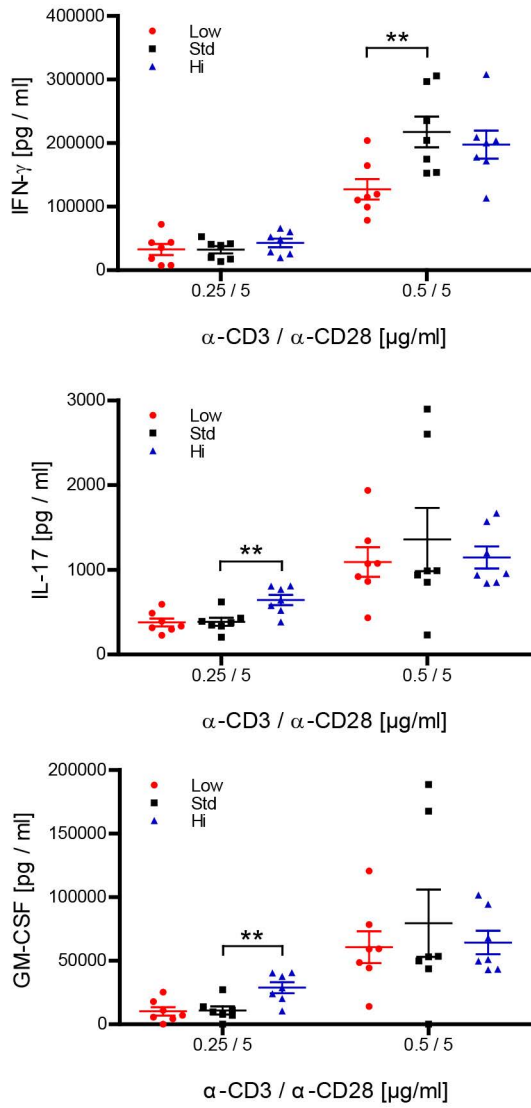

**Suppl. figure 4. Vitamin D high excess supplementation promotes differentiation into encephalitogenic T cells.** Splenic T cells were isolated from naïve WT mice, which were fed with vitamin D low, standard or high diet for eight weeks. MACS purified T cells were incubated in anti-CD3 / anti-CD28 pre-coated wells for 72 hours. Differentiation into Th1-, Th17- or GM-CSF-secreting T cells was analyzed by quantification of IFN- $\gamma$ , IL-17 and GM-CSF concentrations in culture supernatants by ELISA (data given as mean  $\pm$  SEM; n = 7).

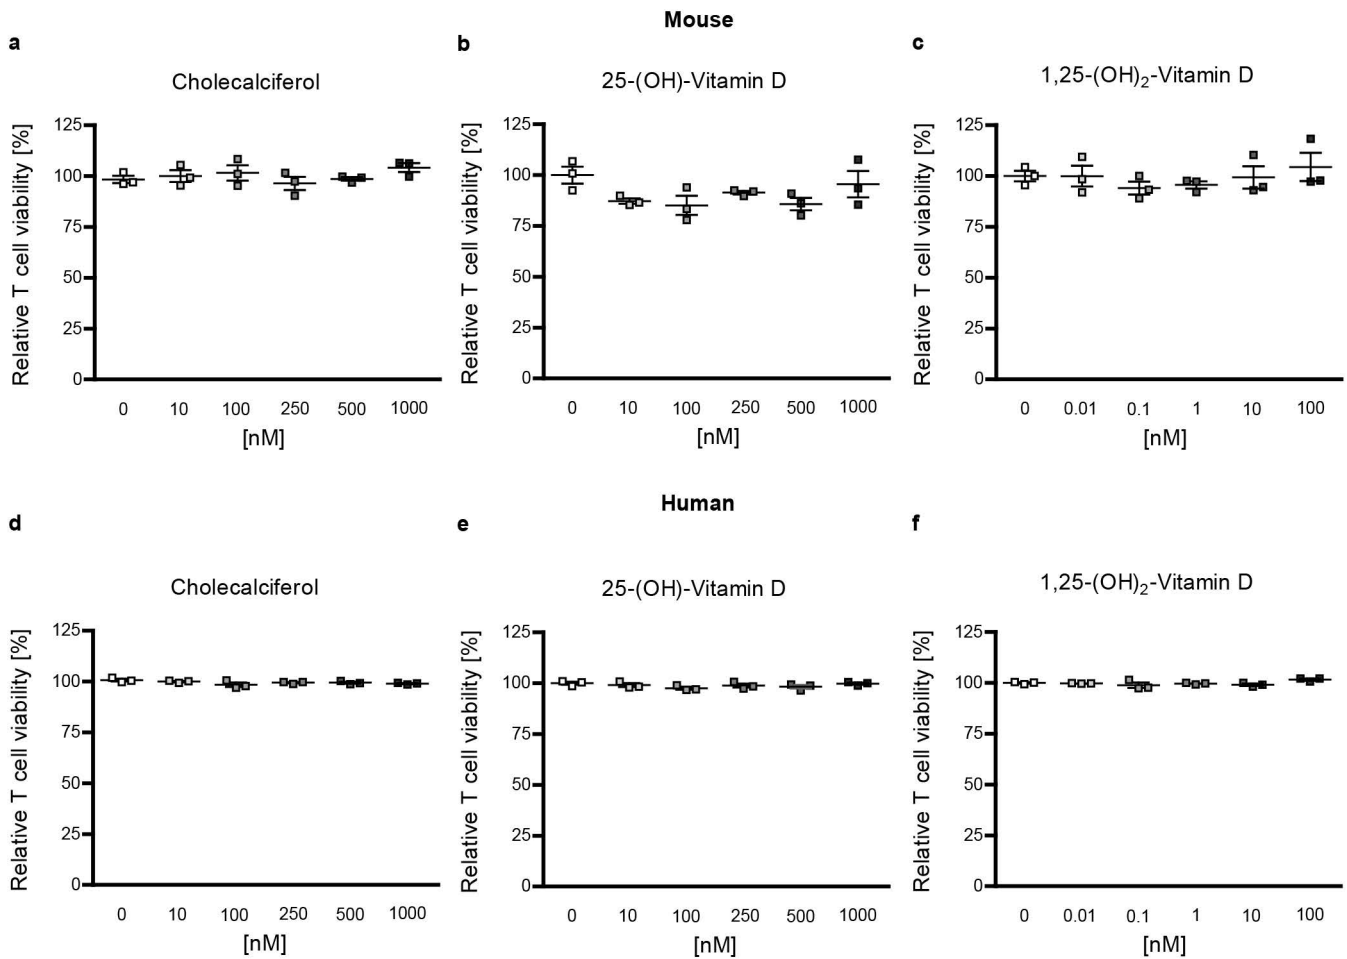

**Suppl. figure 5. T cell viability is unaffected by incubation with cholecalciferol, 25-(OH)-vitamin D or 1,25-(OH)<sub>2</sub>-vitamin D.** (a-c) Splenocytes were isolated from naïve WT mice receiving standard vitamin D diet. (d-f) Human PBMCs were isolated from healthy donors after Ficoll gradient centrifugation. MACS purified T cells were incubated in anti-CD28 pre-coated wells in presence of increasing concentrations of (a, d) cholecalciferol, (b, e) 25-(OH)-vitamin D or (c, f) 1,25-(OH)<sub>2</sub>-vitamin D for 48-72 hours (murine T cells) or 96-120 hours (human T cells). T cell viability was determined by FACS using a fixable live cell- / dead cell discrimination dye (data shown as mean ± SEM; representative plots of two independent experiments; n = 3).

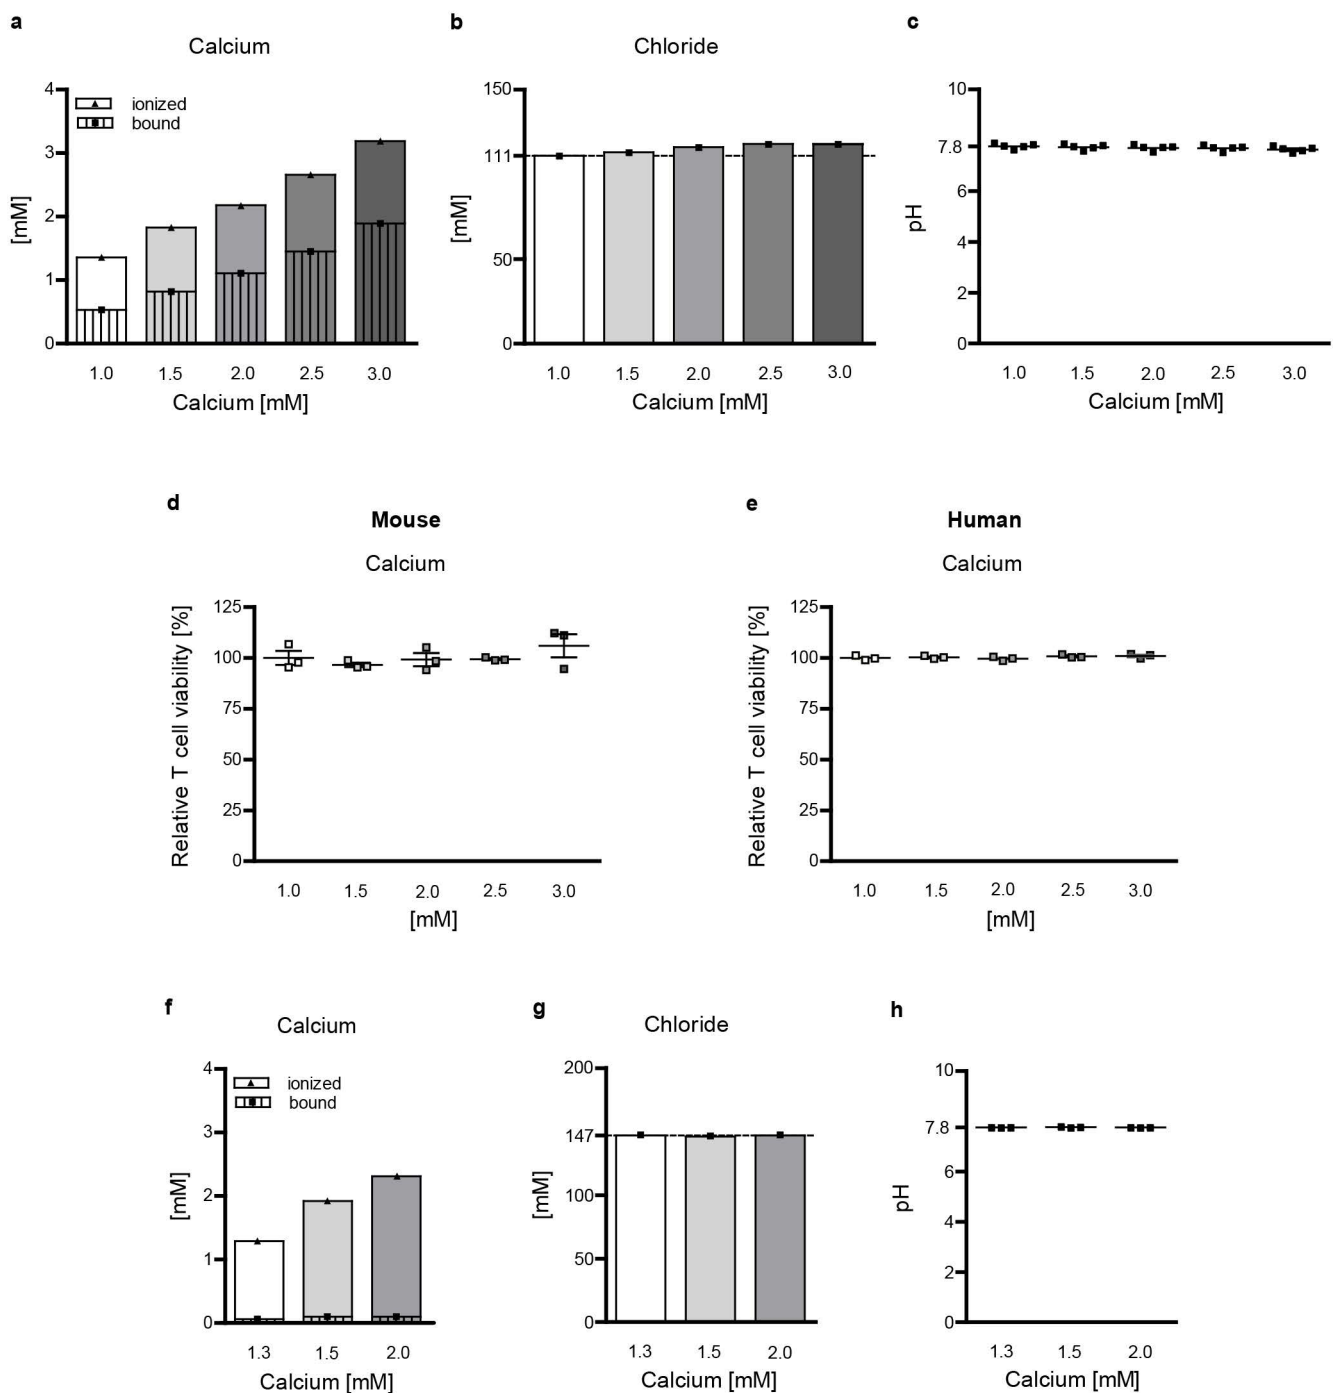

**Suppl. figure 6. Increasing calcium concentrations in culture medium have no effect on chloride levels, pH or T cell viability.** Calcium concentrations in (a) culture medium or (f) calcium flux assay medium were increased by dissolving calcium chloride. (a, f) Total calcium in culture medium was quantified on an ARCHITECT c 16000 analyzer. Ionized calcium was measured on a blood gas analyzer GEM Premier 4000. Bound calcium was calculated by subtracting the ionized calcium from the total calcium concentration. Data from one representative experiment are presented. Total chloride in (b) culture medium or (g) calcium flux assay medium was measured using ion-selective electrodes on an ARCHITECT c 16000 analyzer. Data from one representative experiment are presented. (c, h) pH in calcium-supplemented media was determined by inoLab pH Level 1 (data given as mean  $\pm$  SEM; n = 3). (d) Splenocytes were isolated from naïve WT mice receiving standard vitamin D diet. (e)

Human PBMCs were isolated from healthy donors after Ficoll gradient centrifugation. MACS purified T cells were incubated in anti-CD28 pre-coated wells in presence of increasing calcium concentrations for (d) 48-72 hours (murine T cells) or (e) 96-120 hours (human T cells). T cell viability was determined by FACS using a fixable live cell- / dead cell discrimination dye (data shown as mean  $\pm$  SEM; representative plots of two independent experiments; n = 3).

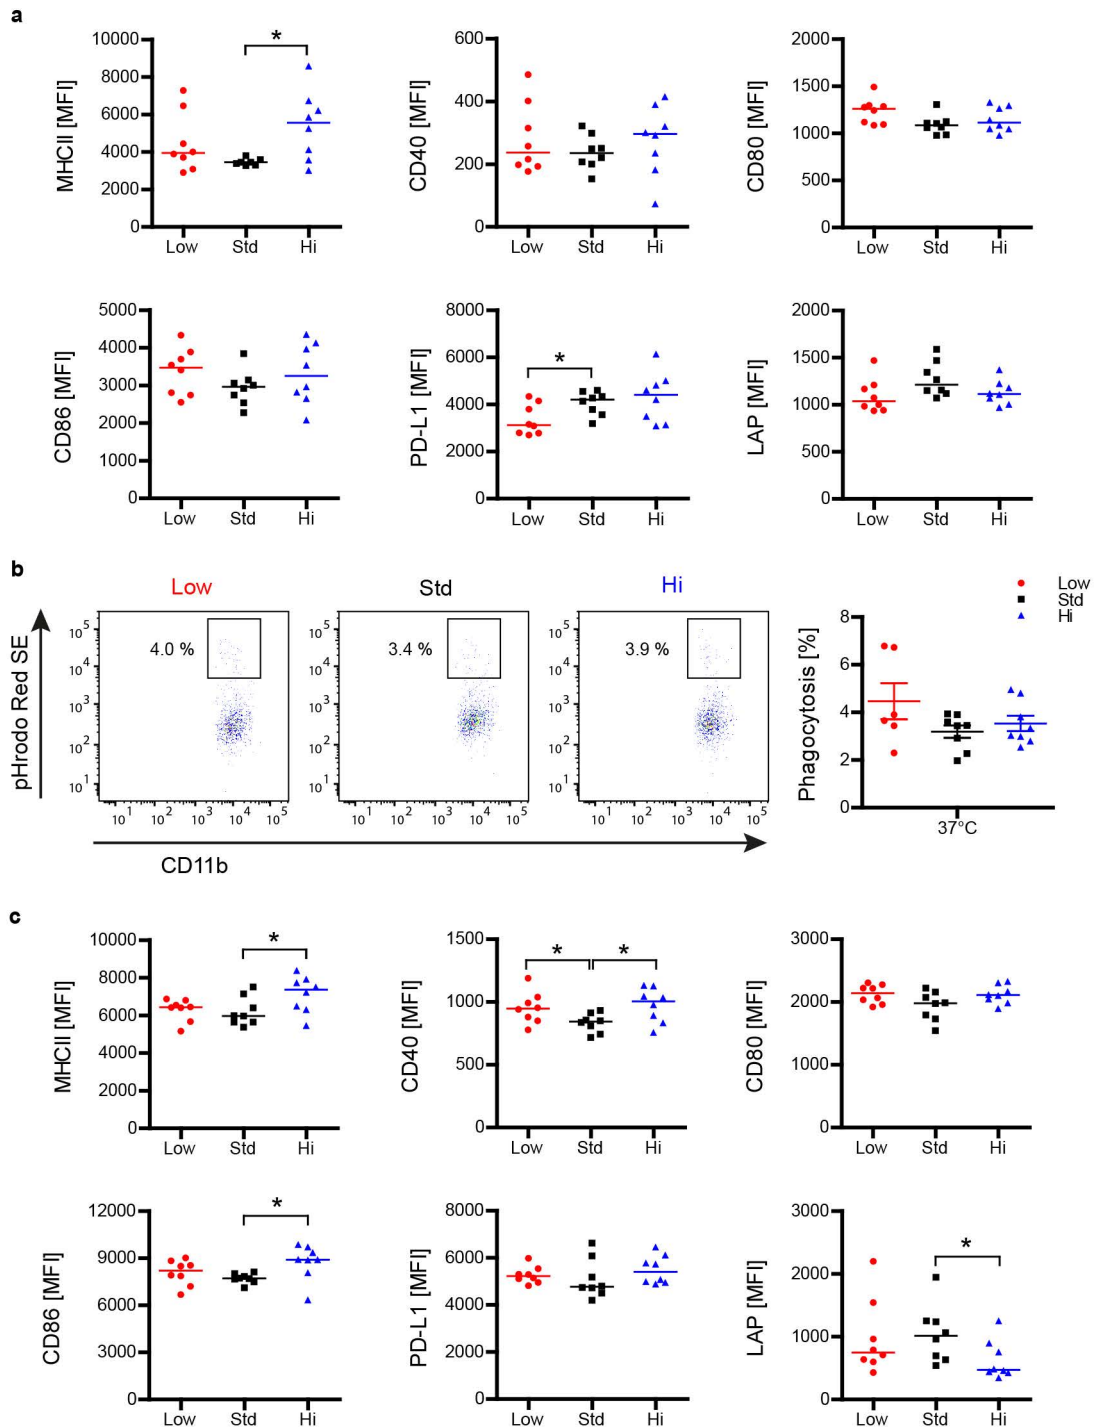

**Suppl. figure 7. Vitamin D high excess supplementation increases activation of splenic monocytes and dendritic cells in naïve mice.** (a) Splenocytes were isolated and splenic monocyte activation / differentiation was analyzed by FACS eight weeks after vitamin D diet onset in naïve mice (data are shown as median of MFI; n = 7-8). (b) Splenic macrophages were isolated eight weeks after vitamin D diet onset from naïve mice and co-cultured with pHrodo Red SE labelled apoptotic thymocytes at 37°C for one hour. Phagocytosis of apoptotic thymocytes by splenic macrophages (CD11b<sup>+</sup>F4/80<sup>+</sup>) was determined by FACS. Representative FACS dot plots are shown left and percentage of phagocytosis by macrophages is depicted on the right as mean ± SEM; n = 6-8. (c) Splenocytes were isolated and splenic dendritic cell activation / differentiation was analyzed by FACS eight weeks after vitamin D diet onset in naïve mice (data are shown as median of MFI; n = 8).
